# Supplementary material for: Constraining light dependency in modeled emissions through comparison to observed biogenic volatile organic compound (BVOC) concentrations in a southeastern US forest
Source: Copernicus journal article supplement (doi:10.5194/acp-24-12495-2024), 2024-11-12
Supplement: Supplementary file 1 [file acp-24-12495-2024-supplement.pdf]

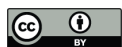

*Supplement of*

## **Constraining light dependency in modeled emissions through comparison to observed biogenic volatile organic compound (BVOC) concentrations in a southeastern US forest**

**Namrata Shanmukh Panji et al.**

*Correspondence to:* Namrata Shanmukh Panji ([namratapanji@vt.edu](mailto:namratapanji@vt.edu)) and Gabriel Isaacman-VanWertz ([ivw@vt.edu](mailto:ivw@vt.edu))

The copyright of individual parts of the supplement might differ from the article licence.

## Emission Factors for VFRL

**Table S1.** Emission factors for grid cell at standard conditions.

| Categories                             | Emission Factor<br>( $nmol.m^{-2}.s^{-1}$ ) |
|----------------------------------------|---------------------------------------------|
| isoprene                               | 15.16                                       |
| MBO                                    | 0.46                                        |
| pinenes                                | 0.27                                        |
| ocimenes                               | 0.22                                        |
| carene                                 | 0.20                                        |
| limonene                               | 0.21                                        |
| cymene                                 | 0.03                                        |
| camphor                                | 0.05                                        |
| b-caryophyllene                        | 0.07                                        |
| longifolene                            | 0.04                                        |
| methanol                               | 1.60                                        |
| acetone                                | 0.40                                        |
| acetaldehyde and ethanol               | 0.70                                        |
| formic acid; acetic acid; pyruvic acid | 0.40                                        |
| ethene; ethane                         | 1.27                                        |
| methacrolein                           | 0.10                                        |
| linalool                               | 0.20                                        |
| other VOC                              | 0.04                                        |
| CO                                     | 1                                           |

## Tree Species composition at VFRL

**Table S2.** Tree species composition at VFRL with the fraction of the grid occupied by the corresponding species.

| Species                        | Grid Fraction | Type            |
|--------------------------------|---------------|-----------------|
| <i>Quercus alba</i>            | 0.2364        | Broadleaf tree  |
| <i>Pinus virginiana</i>        | 0.2006        | Needleleaf tree |
| <i>Quercus falcata</i>         | 0.1186        | Broadleaf tree  |
| <i>Acer rubrum</i>             | 0.1146        | Broadleaf tree  |
| <i>Liriodendron tulipifera</i> | 0.1026        | Broadleaf tree  |
| <i>Carya</i>                   | 0.0453        | Broadleaf tree  |
| <i>Fagus grandifolia</i>       | 0.0443        | Broadleaf tree  |
| <i>Quercus rubra</i>           | 0.0389        | Broadleaf tree  |
| <i>Pinus taeda</i>             | 0.0277        | Needleleaf tree |
| <i>Liquidambar styraciflua</i> | 0.02          | Broadleaf tree  |
| <i>Nyssa sylvatica</i>         | 0.0178        | Broadleaf tree  |
| <i>Quercus marilandica</i>     | 0.0104        | Broadleaf tree  |
| <i>Cornus florida</i>          | 0.008         | Broadleaf tree  |
| <i>Juniperus virginiana</i>    | 0.0047        | Needleleaf tree |
| <i>Quercus prinus</i>          | 0.0025        | Broadleaf tree  |
| <i>Sassafras albidum</i>       | 0.0018        | Broadleaf tree  |
| <i>Platanus occidentalis</i>   | 0.0018        | Broadleaf tree  |
| <i>Populus deltoides</i>       | 0.0015        | Broadleaf tree  |
| <i>Carpinus caroliniana</i>    | 0.0012        | Broadleaf tree  |
| <i>Quercus stellata</i>        | 0.0008        | Broadleaf tree  |
| <i>Ilex opaca</i>              | 0.0002        | Broadleaf tree  |
| <i>Castanea pumila</i>         | 0.0001        | Broadleaf tree  |

### Correlation of meteorological data at VFRL with those from Weather Underground

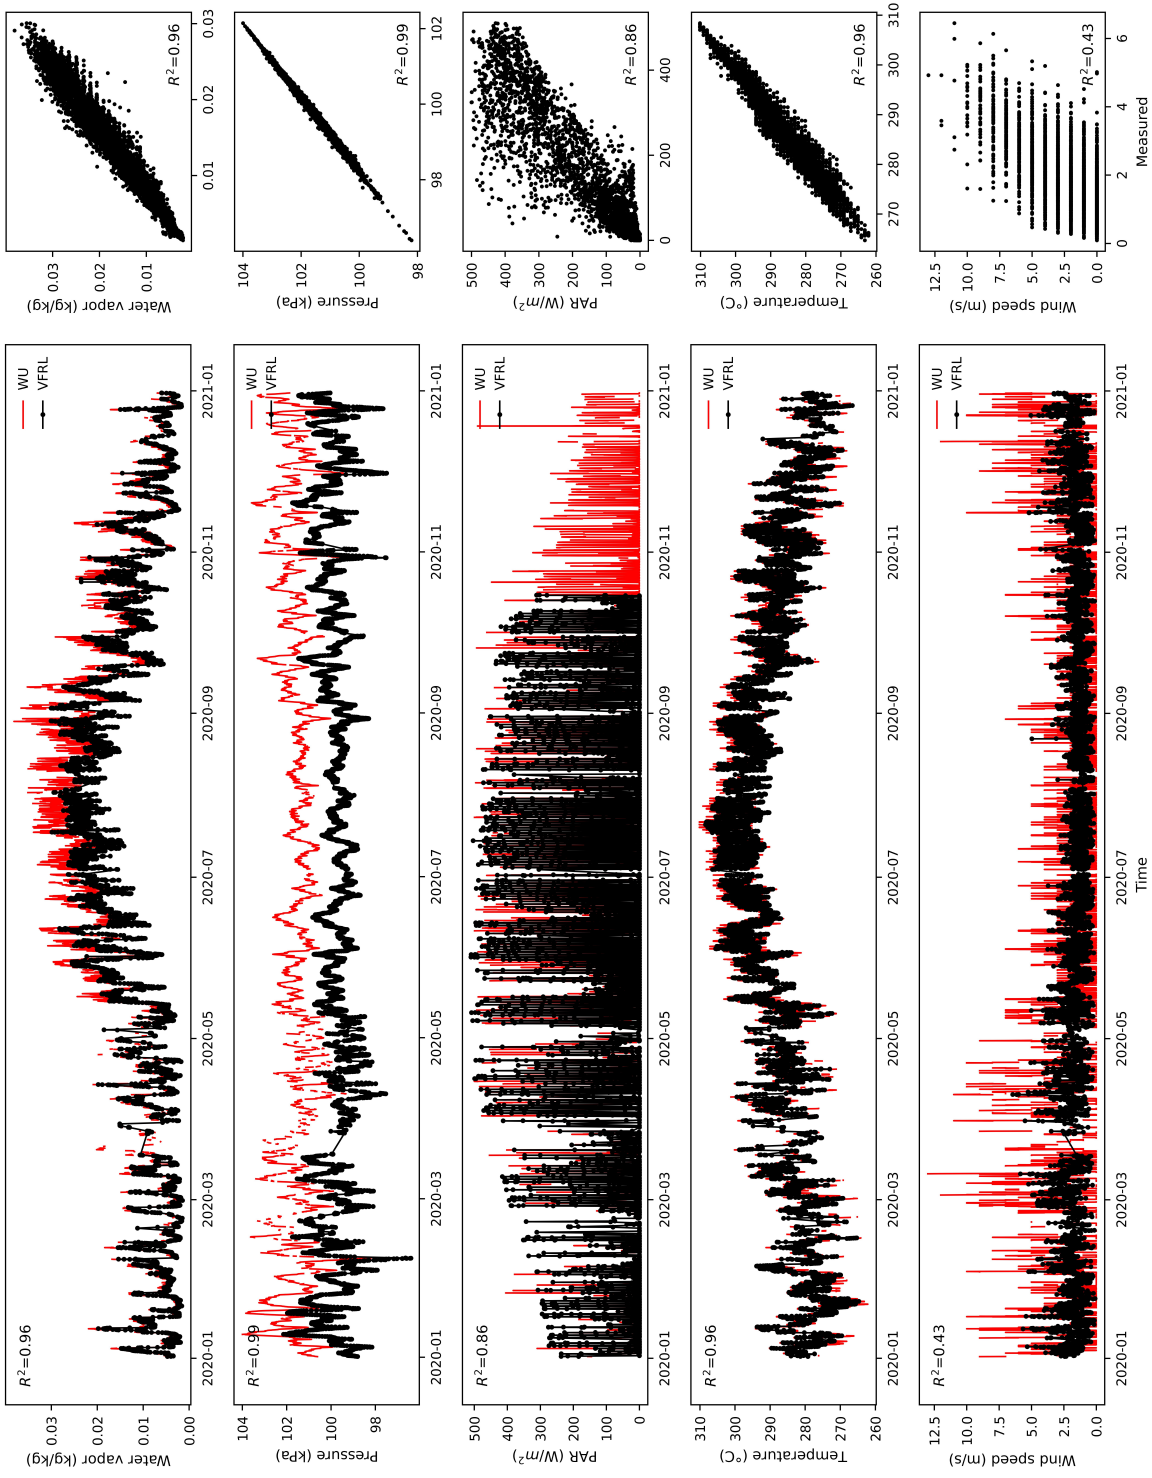

**Figure S1.** Timeseries of meteorological parameters measured at the Virginia Forest Research Laboratory (VFRL, black lines) and those obtained from Weather Underground identifiers as mentioned in Section 2.2 (in red). The Pearson Correlation coefficient is denoted by  $R^2$ .

## Timeseries of $\alpha$ -pinene with adjusted LDF values.

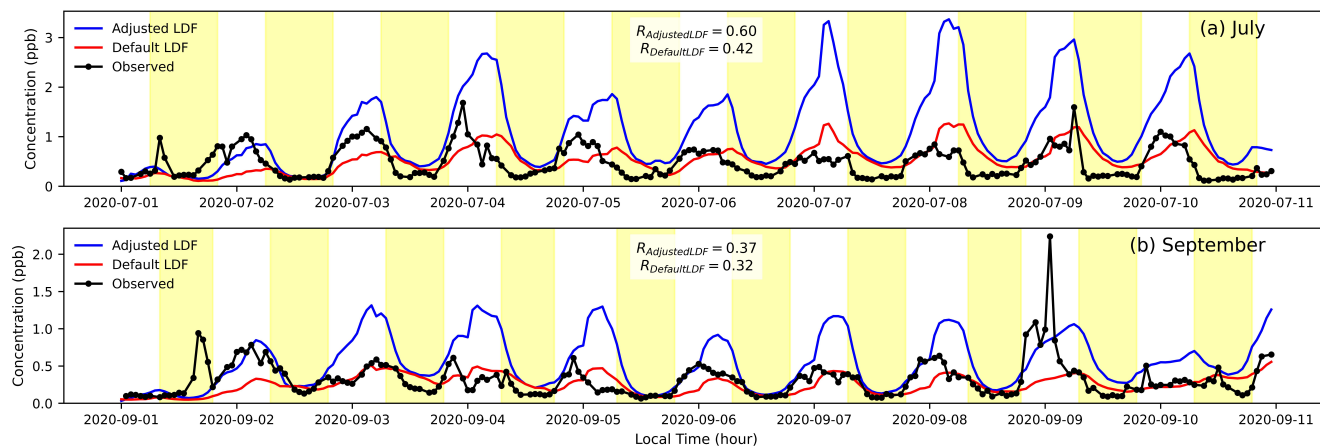

**Figure S2.** A snapshot of  $\alpha$ -pinene concentrations (in ppb) for January, July, and September of 2020 using the monthly LDF as shown in Figure 6. The Pearson correlation coefficient values of the adjusted and default modeled (refer to Table 1) concentrations against the observed concentrations are reported as  $R_{\text{AdjustedLDF}}$  and  $R_{\text{DefaultLDF}}$ .

## Rates of reaction for additional BVOCs added to MCMv3.3.1.

**Table S3.** Rates of reaction of BVOCs added to MCMv3.3.1 where  $k_{\text{OH}-i}$  and  $k_{\text{O}_3-i}$  are the second order reaction rates of compound *emphi* with OH and O<sub>3</sub> in  $\text{cm}^3 \cdot \text{molecule}^{-1} \cdot \text{s}^{-1}$

| Compound ( <i>i</i> ) | $k_{\text{O}_3-i}$<br>( $\text{cm}^3 \cdot \text{molecule}^{-1} \cdot \text{s}^{-1}$ ) | $k_{\text{OH}-i}$<br>( $\text{cm}^3 \cdot \text{molecule}^{-1} \cdot \text{s}^{-1}$ ) | References                    |
|-----------------------|----------------------------------------------------------------------------------------|---------------------------------------------------------------------------------------|-------------------------------|
| $\beta$ -phellandrene | $4.77 \times 10^{-17}$                                                                 | $1.68 \times 10^{-10}$                                                                | Shorees et al. (1991)         |
| Camphene              | $5.10 \times 10^{-19}$                                                                 | $5.30 \times 10^{-11}$                                                                | Gaona-Colmán et al. (2017)    |
| Tricyclene            | None                                                                                   | $3.54 \times 10^{-12}$                                                                | US EPA (2024)                 |
| $\beta$ -Thujene      | $1.13 \times 10^{-17}$                                                                 | $6.09 \times 10^{-11}$                                                                | US EPA (2024)                 |
| $\alpha$ -Fenchene    | $1.13 \times 10^{-17}$                                                                 | $5.96 \times 10^{-11}$                                                                | US EPA (2024)                 |
| Sabinene              | $8.60 \times 10^{-17}$                                                                 | $1.17 \times 10^{-10}$                                                                | Atkinson et al. (1990b, a)    |
| $\alpha$ -Cymene      | None                                                                                   | $8.54 \times 10^{-12}$                                                                | US EPA (2024)                 |
| $\gamma$ -terpinene   | $1.40 \times 10^{-16}$                                                                 | $1.77 \times 10^{-10}$                                                                | Atkinson et al. (1990b)       |
| $\alpha$ -Cedrene     | $2.78 \times 10^{-17}$                                                                 | $6.70 \times 10^{-11}$                                                                | Shu and Atkinson (1994, 1995) |
| $\beta$ -cedrene      | $1.70 \times 10^{-16}$                                                                 | $6.53 \times 10^{-11}$                                                                | Richters et al. (2015)        |

## Monthly variation of LDF throughout the year for other BVOCs.

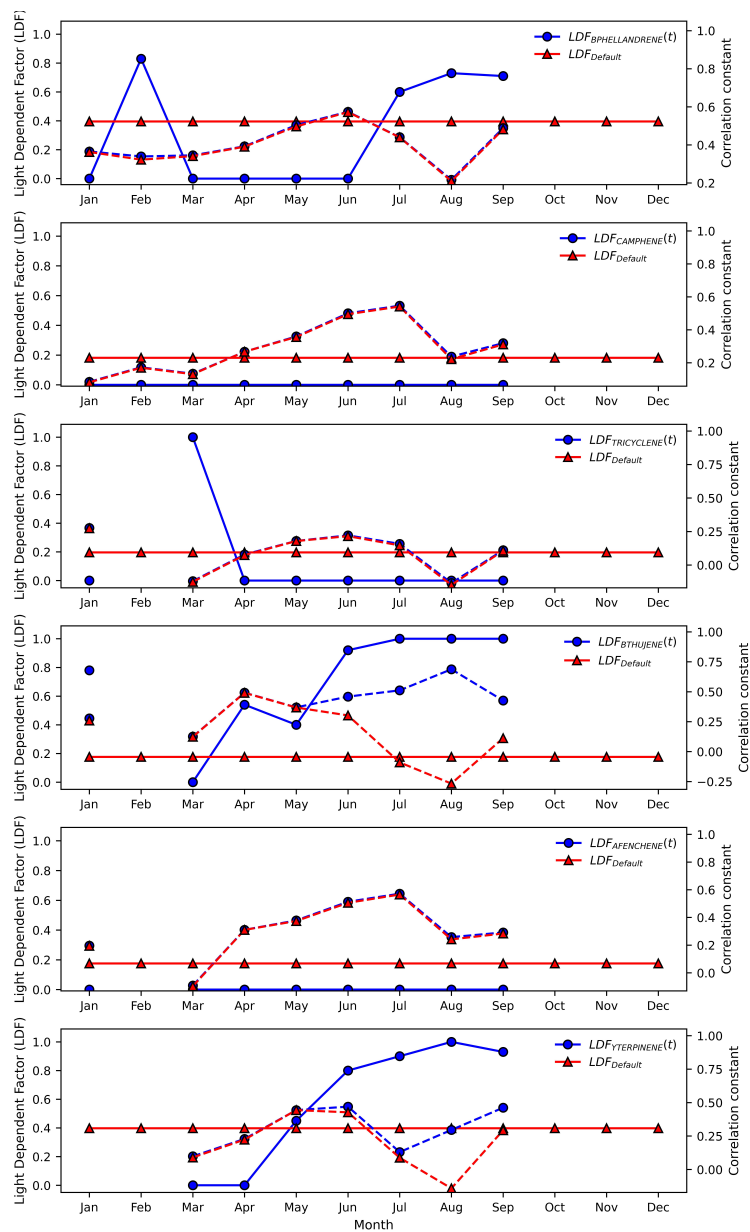

**Figure S3.** Monthly variation of LDF for  $\alpha$ -fenchene,  $\beta$ -phellandrene,  $\beta$ -thujene, camphene, tricyclene and  $\gamma$ -terpinene estimated by maximizing the correlation between observed concentrations and those estimated by MEGANv3.2 and FOAM at VFRL. The blue markers represent the adjusted LDF values, the red line represents the LDF used by default in MEGANv3.2. The blue and red solid lines present the LDF values and the dashed lines represent the corresponding Pearson correlation coefficients.

**Variation of correlation constant with LDF throughout the seasons for all BVOCs simulated.**

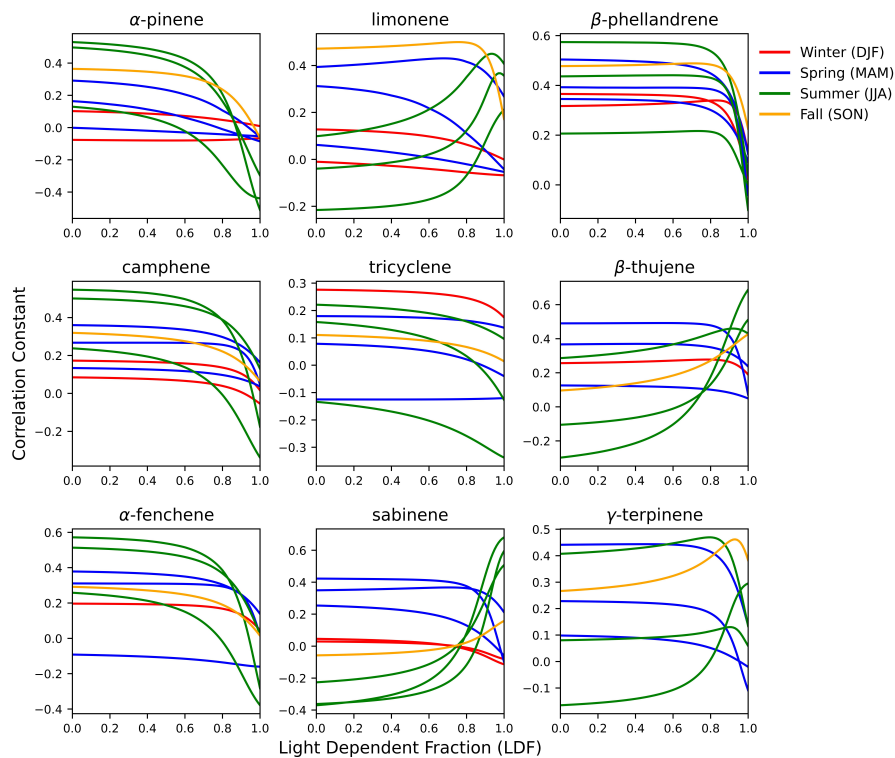

**Figure S4.** Variation of the Pearson correlation coefficient between modeled and measured concentration with LDF for  $\alpha$ -pinene, limonene,  $\beta$ -phellandrene, camphene, tricyclene,  $\beta$ -thujene,  $\alpha$ -fenchene, sabinene, and  $\gamma$ -terpinene at VFRL. The red lines represent winter (Dec, Jan, Feb), blue lines spring (Mar, Apr, May), green lines summer (Jun, Jul, Aug), and orange lines fall (Sep, Oct, Nov) months.

## Seasonal LDFs for all BVOCs simulated.

**Table S4.** Seasonal variation of Light-dependent Factors for  $\alpha$ -pinene, limonene,  $\beta$ -phellandrene, camphene, tricyclene,  $\beta$ -thujene,  $\alpha$ -fenchene, sabinene, and  $\gamma$ -terpinene at VFRL.

| Compound              | Winter (DJF) | Spring (MAM) | Summer (JJA) | Fall (SON) |
|-----------------------|--------------|--------------|--------------|------------|
| $\alpha$ -pinene      | 0            | 0            | 0            | 0          |
| limonene              | 0            | 0.23         | 0.97         | 0.76       |
| $\beta$ -phellandrene | 0.42         | 0            | 0.44         | 0.71       |
| camphene              | 0            | 0            | 0            | 0          |
| tricyclene            | 0            | 0.33         | 0            | 0          |
| $\beta$ -thujene      | 0.78         | 0.31         | 0.97         | 1          |
| $\alpha$ -fenchene    | 0            | 0            | 0            | 0          |
| sabinene              | 0            | 0.24         | 1            | 1          |
| $\gamma$ -terpinene   |              | 0.15         | 0.90         | 0.93       |



## Comparison of Ozone Concentrations at VFRL and EPA Albemarle High School Station.

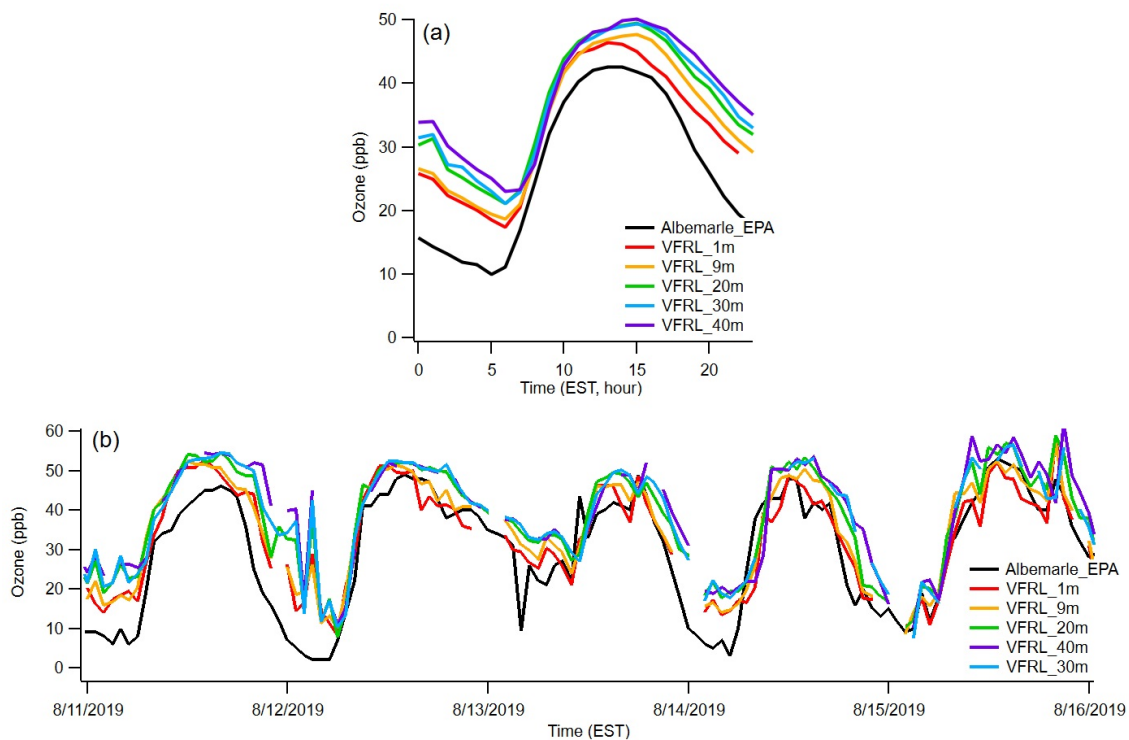

**Figure S5.** Ozone measured at the Virginia Forest Research Laboratory (VFRL) at different heights from the ground (1, 9, 20, 30, 40 m) and at the EPA monitoring station in Albemarle, VA: (a) average diurnal for all data June through November of 2019, and (b) Sample five-day period showing similar day-to-day variability.

### Model sensitivity to ozone concentrations.

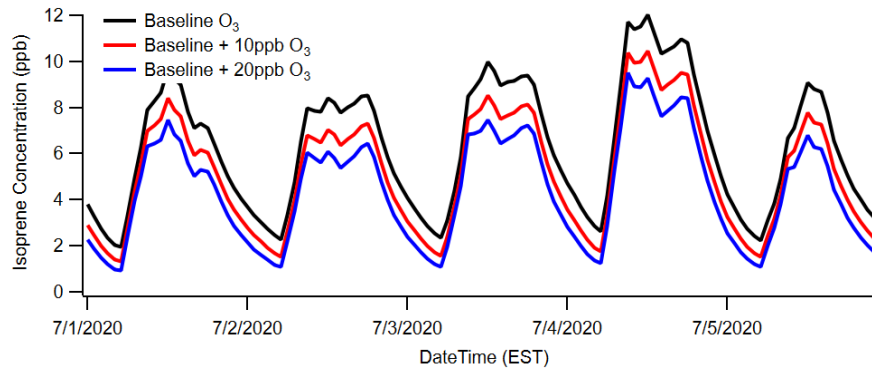

**Figure S6.** Simulated concentrations of isoprene (in ppb) over 5 days in July, 2020 with the ozone used in our model (Baseline O<sub>3</sub> denoted by a black line) and at elevated ozone levels (Baseline + 10ppb O<sub>3</sub> and Baseline + 20ppb O<sub>3</sub> denoted by red and blue lines respectively).
